# Supplementary material
Source: PubMed Central journal article supplement (PMC2939805)
Supplement: supp_123_19_3401__3.pdf [file supp_123_19_3401__3.pdf]

**A**

5'CCTCACAGGGAGGTGGGGTGGGGTGGGGTTACAGAAGCAAGCTGCTGCACCCAGCTTTTACC  
TGGGAGCCAGTGATCCTAACTCAGGTCCACCCACTGAGCCATCTCTTCAGCCCCTCCTACTGT  
CTTTGCATTTCAATTGATGGAGTTCTTTGAAACACACACATTCTTCAAAAAGTGAAGTTCATGGCT  
GGGCAGTGGTAGAGCATGCCTTGGGAAGCAGAAGCAGGCGGATCTTTGAAATTCGAGACCAGC  
CTGGT

**B**

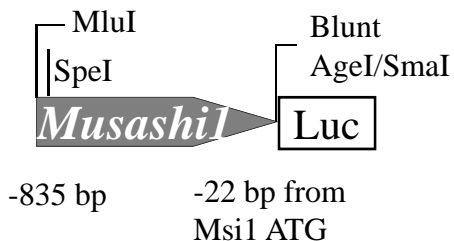

**pMsi1-1-Luc**

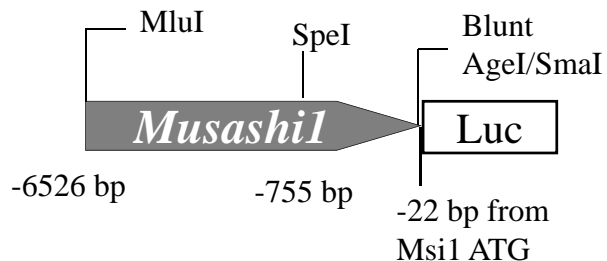

**pMsi1-7-Luc**
