# Supplementary material
Source: PubMed Central journal article supplement (PMC2939805)
Supplement: supp_123_19_3401__8.pdf [file supp_123_19_3401__8.pdf]

**Table S1.** Deregulated mRNAs identified by PCR array

| PCR Array   | Cdc2a | Ccnd2 | Frat1 | Myst1 |
|-------------|-------|-------|-------|-------|
| Fold Change | 1.42  | 1.29  | 1.55  | 1.31  |
| pvalue      | 0.11  | 0.01  | 0.05  | 0.03  |
