# Supplementary material
Source: PubMed Central journal article supplement (PMC2939805)
Supplement: supp_123_19_3401__9.pdf [file supp_123_19_3401__9.pdf]

**Table S2.** Sequences of the primers used for qPCR analysis.

|           | Forward sequence          | Reverse sequence         |
|-----------|---------------------------|--------------------------|
| 36B4      | ACCTCCTTCTTCCAGGCTTT      | CCCACCTTGTCTCCAGTCTTT    |
| Cyclin D1 | CAGAGGCGGATGAGAACAAGT     | GCGGTAGCAGGAGAGGAAG      |
| Msi1UTR   | TCTGGCTCCCCTACTAACCTC     | GGCAACTGGCTAATCCAAAA     |
| Msi1CDS   | ATGCTGGGTATTGGGATGCT      | CGGGGA ACTGGTAGGTGTAA    |
| Frat1     | GGGCCATTTGTAATAACAGC      | GTCGCTCAGAGTGAACAGTG     |
| Hes1      | CTACCCGTAAAGTCCCTAGCC     | AAAGCAACAAAATAACCACCAAAA |
| Axin2     | ATGCTAGGCGGAATGAAGATG     | GGAGACAACGCTGTTGTTCTC    |
| CD44      | GAATGTAACCTGCCGCTACG      | GGAGGTGTTGGACGTGAC       |
| Lgr5      | GACAATGCTCTCACAGAC        | GGAGTGGATTCTATTATTATGG   |
| Bmi1      | TATAACTGATGATGAGATAATAAGC | CTGGAAAGTATTGGGTATGTC    |
