# Supplementary material
Source: PubMed Central journal article supplement (PMC2939805)

**A**

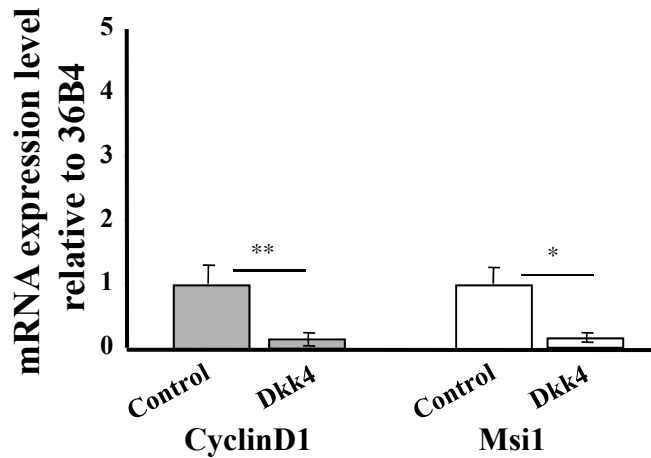

**Nuclei/BrdU**

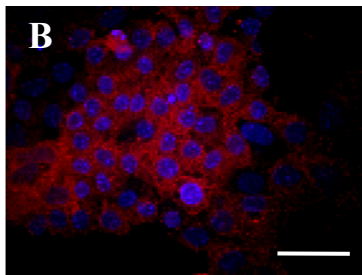

**Nuclei/ $\beta$ -catenin**

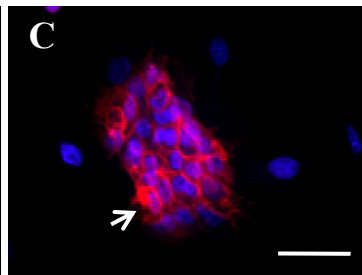

**Nuclei/Msi1**

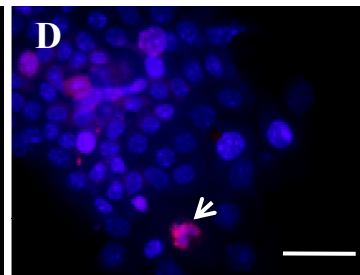

Supplement: supp_123_19_3401__1.pdf [file supp_123_19_3401__1.pdf]

**A**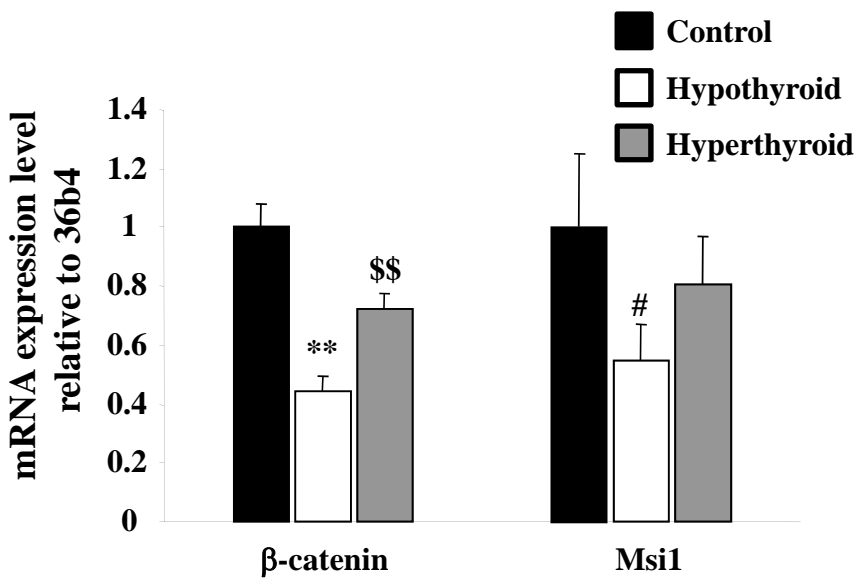**B**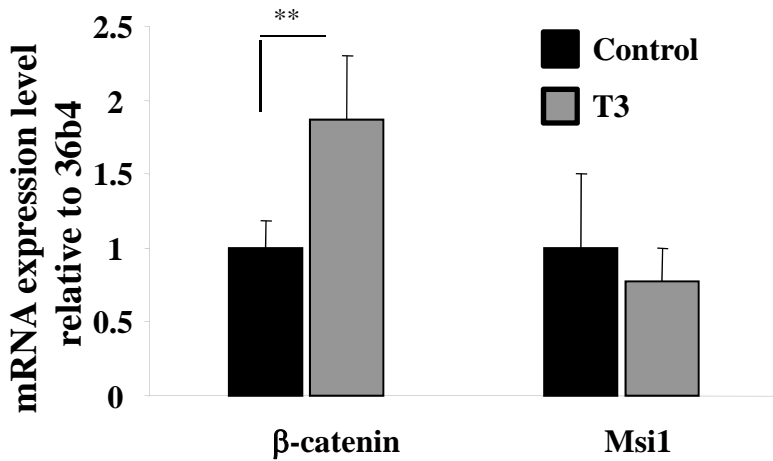**C**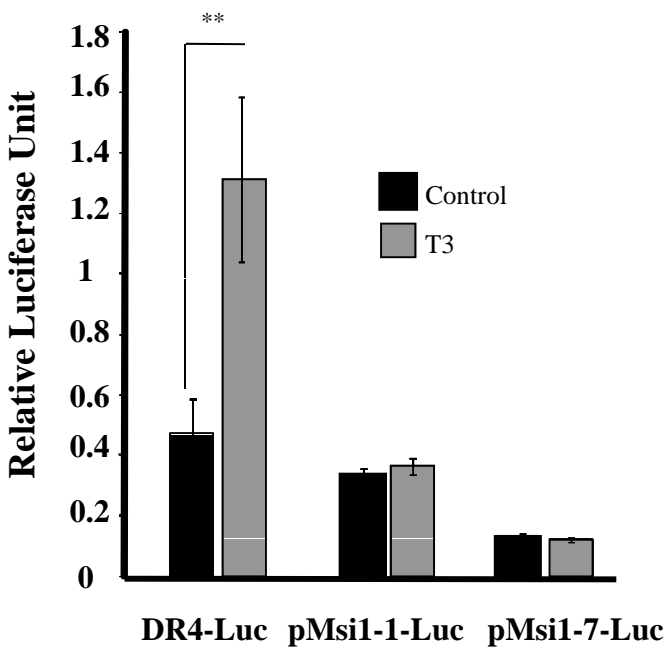

Supplement: supp_123_19_3401__2.pdf [file supp_123_19_3401__2.pdf]

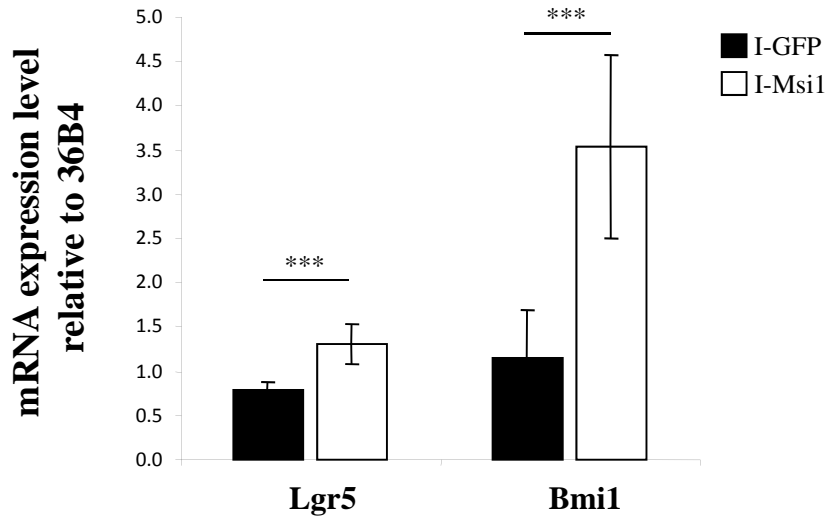

Supplement: supp_123_19_3401__4.pdf [file supp_123_19_3401__4.pdf]

**A**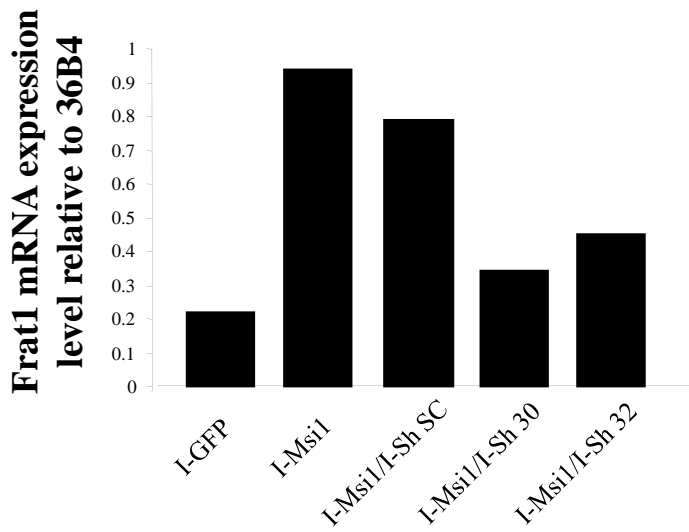**B**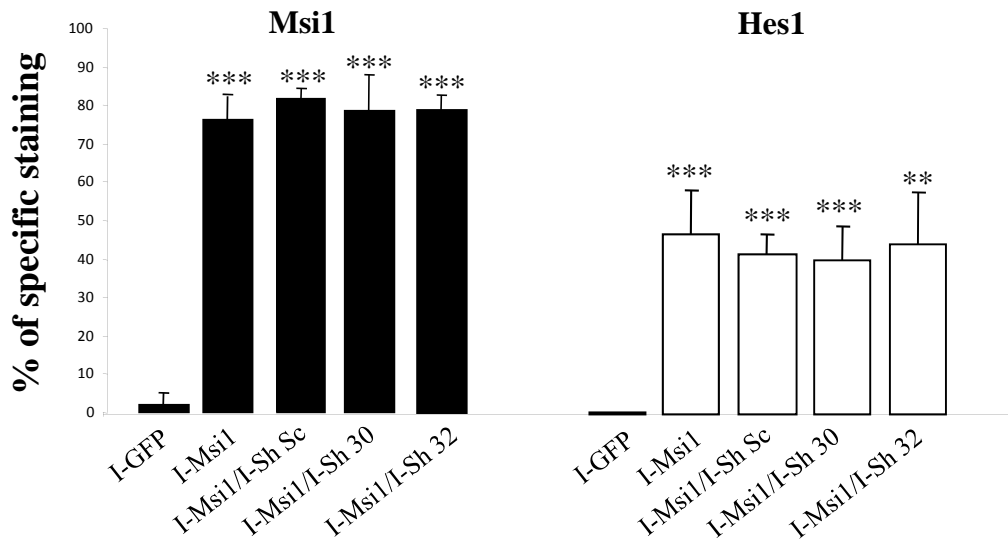

Supplement: supp_123_19_3401__5.pdf [file supp_123_19_3401__5.pdf]

A

# IEC6-GFP

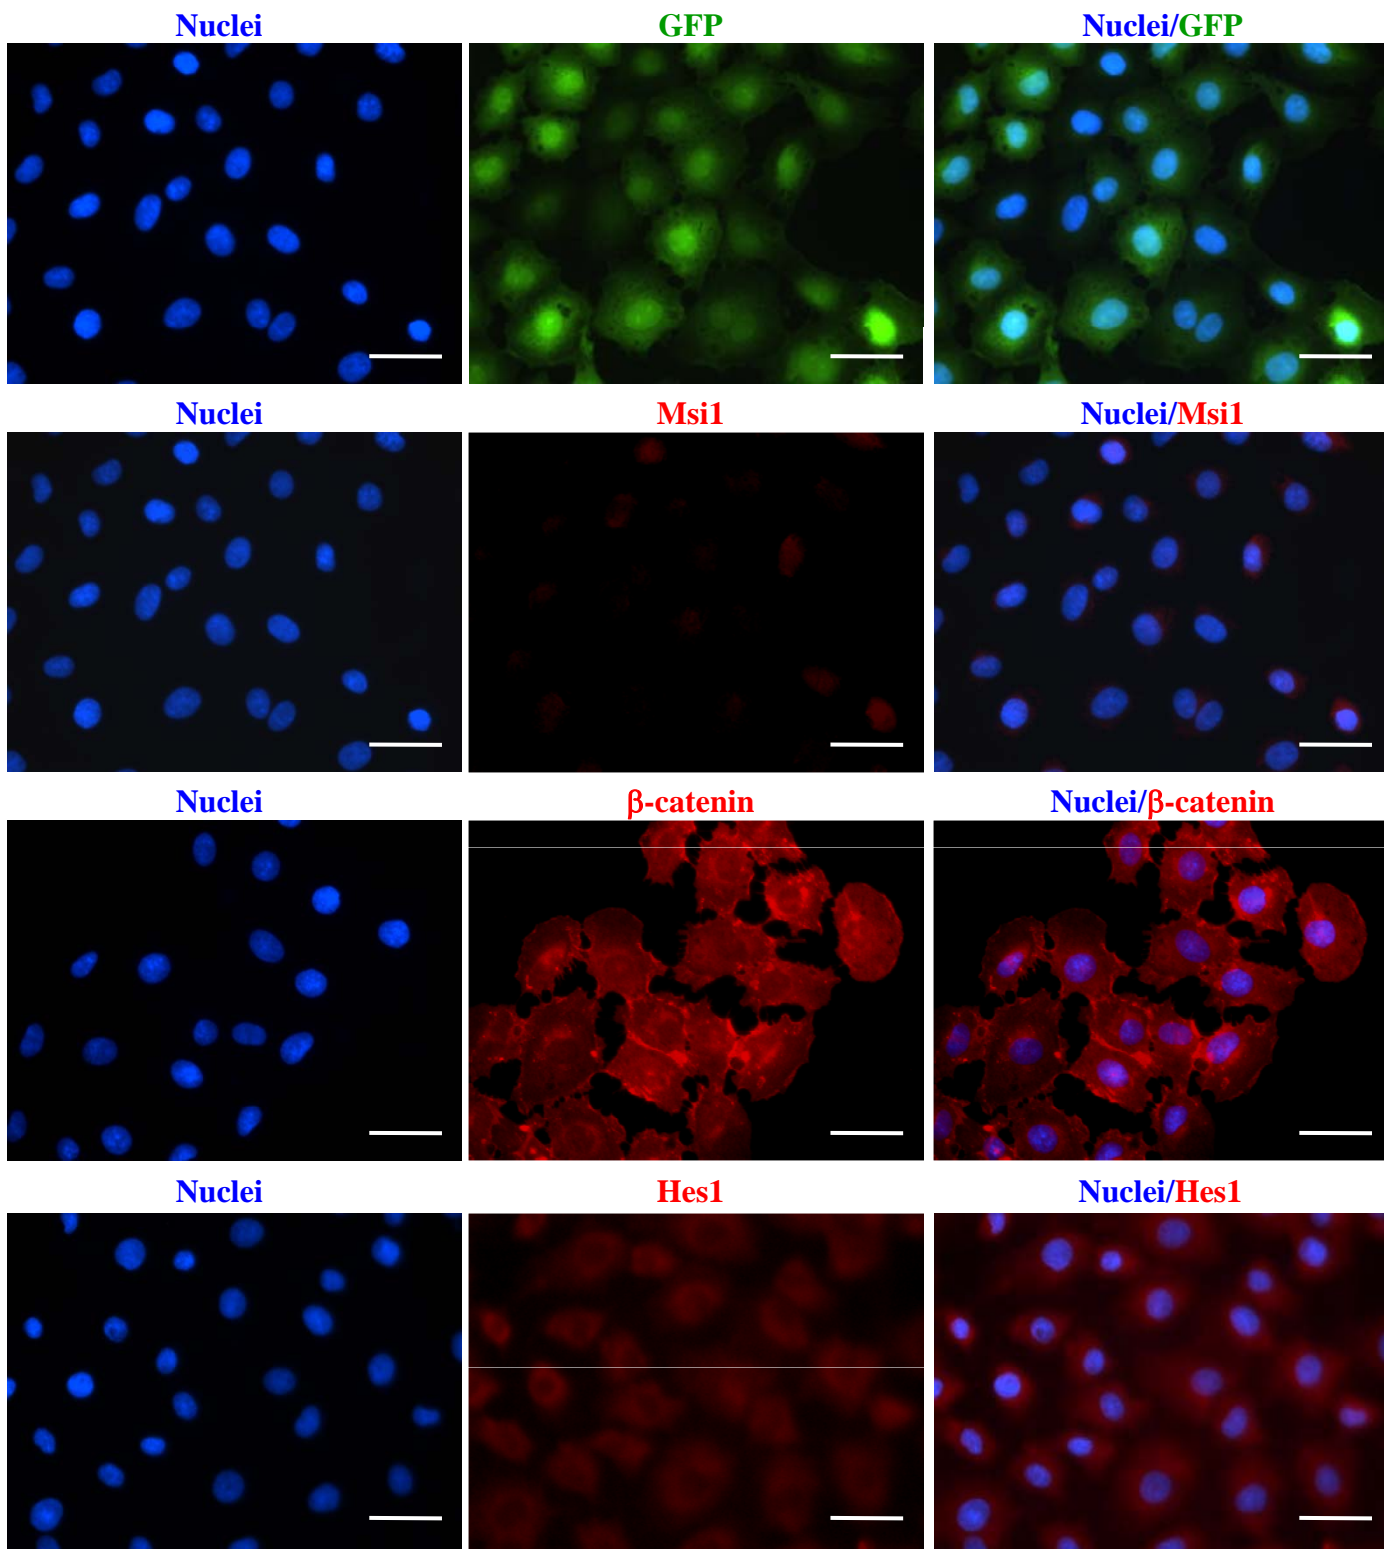

**B**

# IEC6-Msi1

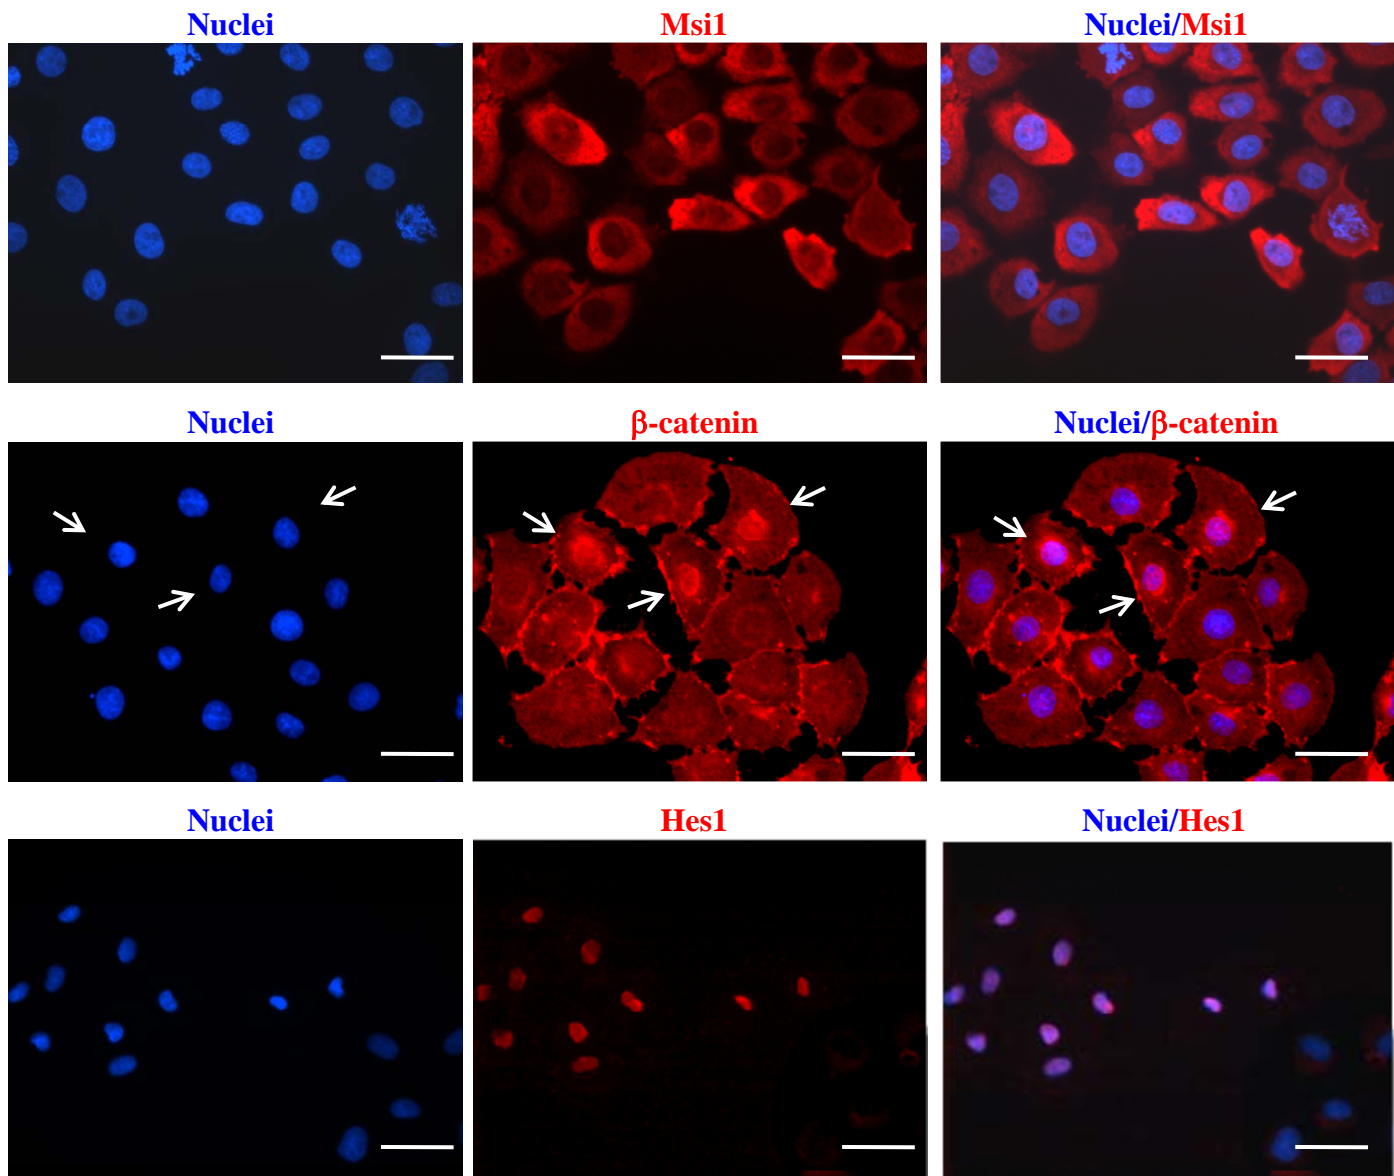

Supplement: supp_123_19_3401__6.pdf [file supp_123_19_3401__6.pdf]

**Vimentin**

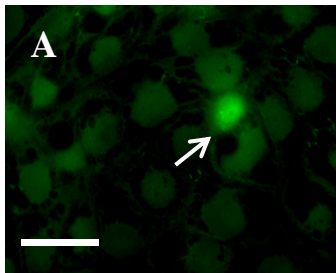

**Hoechst**

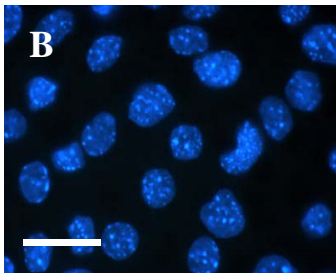

**merging**

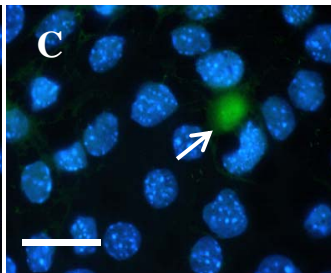

**Smooth muscle actin**

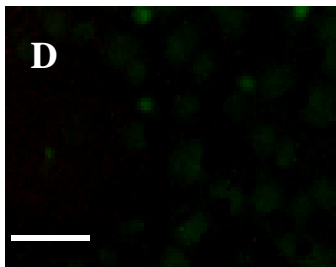

**Hoechst**

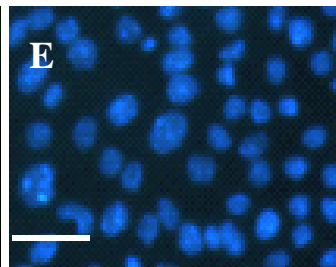

**merging**

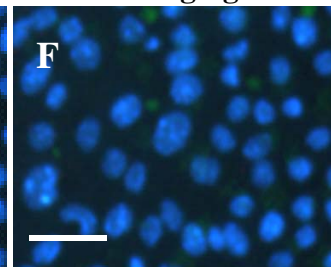

**Cytokeratin**

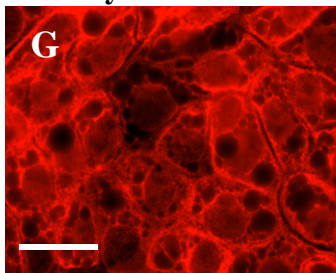

**Hoechst**

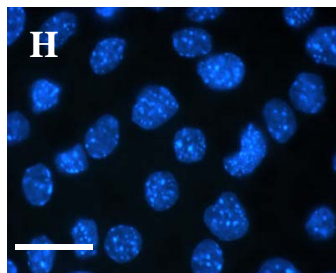

**merging**

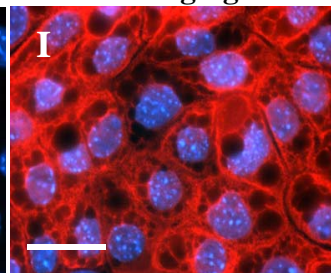

Supplement: supp_123_19_3401__7.pdf [file supp_123_19_3401__7.pdf]
